# Supplementary material
Source: publisher site journal article supplement (https://www.spandidos-publications.com/7396/downloadSupplementary)

Figure S1. Kaplan-Meier curves of OS for all patients. OS, overall survival.

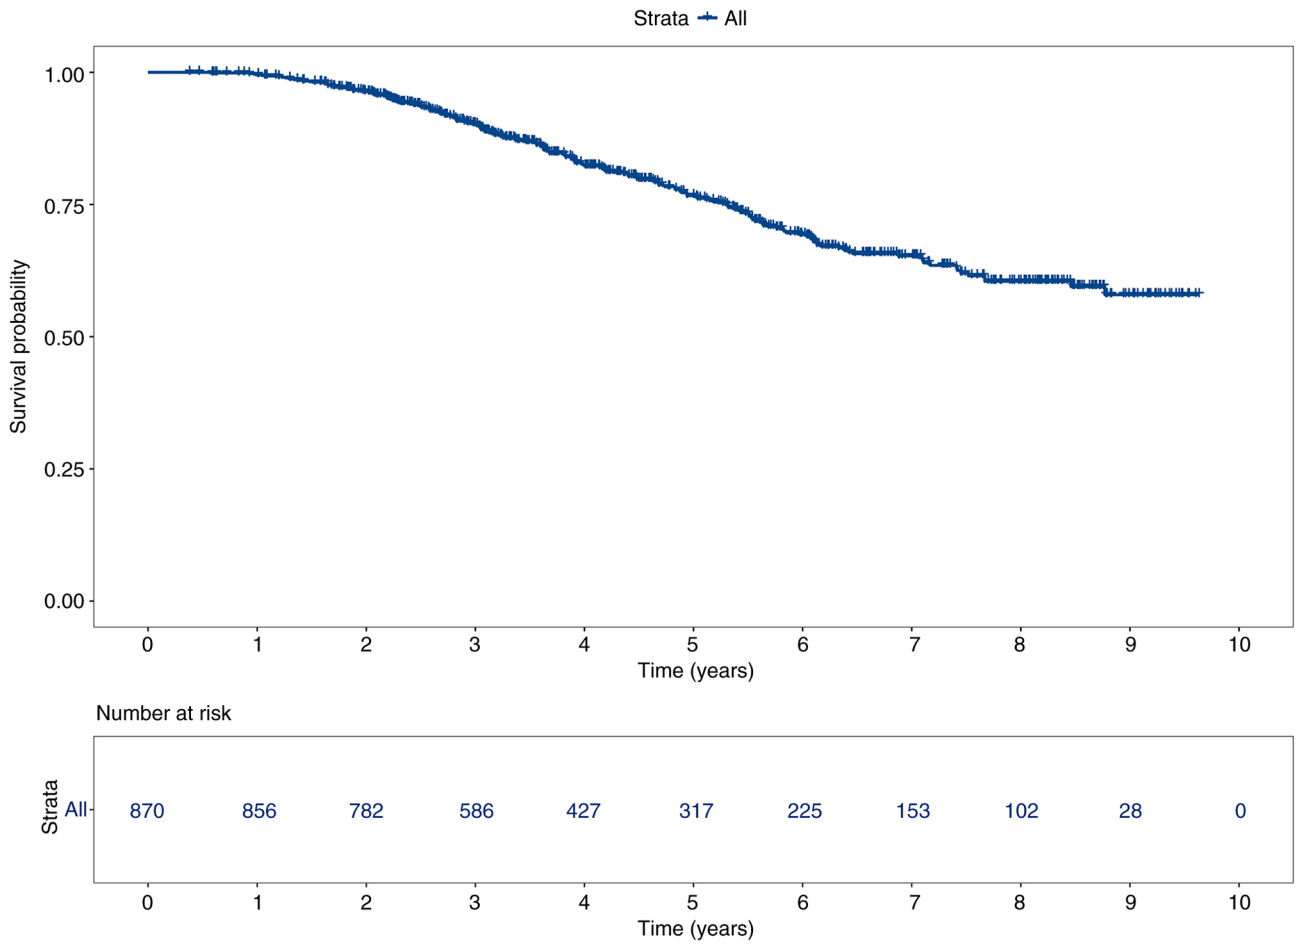

Supplement: Supplementary file 1 [file downloadSupplementary]
